# Supplementary material
Source: ML conference proceedings conference paper supplement (https://openreview.net/forum?id=85mHNaXEDk)
Supplement: supplementary_material [file attachment]

# Appendix

Table 1: The color contrast and shape complexity of different categories in MAD dataset.

| Category         | 01    | 02    | 03    | 04    | 05    |
|------------------|-------|-------|-------|-------|-------|
| Color Contrast   | 73.45 | 35.71 | 49.22 | 41.84 | 35.69 |
| Shape Complexity | 65.79 | 57.9  | 24.53 | 100   | 81.58 |
| Category         | 06    | 07    | 08    | 09    | 10    |
| Color Contrast   | 71.38 | 74.59 | 35.41 | 40.98 | 54.35 |
| Shape Complexity | 11.25 | 46.23 | 73.97 | 55.97 | 23.92 |
| Category         | 11    | 12    | 13    | 14    | 15    |
| Color Contrast   | 52.34 | 86.32 | 66.15 | 55.10 | 32.85 |
| Shape Complexity | 42.43 | 43.77 | 29.49 | 28.18 | 56.1  |
| Category         | 16    | 17    | 18    | 19    | 20    |
| Color Contrast   | 61.28 | 36.18 | 58.10 | 37.75 | 35.98 |
| Shape Complexity | 0     | 49.76 | 15.53 | 62.18 | 79.03 |

Table 2: Results for pixel-level AUROC / pixel-level AP / image-level AUROC on MAD dataset using IGSPAD.

| MPS               | ✗                    | ✓                    |
|-------------------|----------------------|----------------------|
| Feature Extractor | sam_b                | sam_b                |
| Gorilla           | 0.9971/0.6388/0.9285 | 0.9984/0.8099/0.9611 |
| Unicorn           | 0.9982/0.6624/0.9995 | 0.9993/0.8531/0.9974 |
| Mallard           | 0.9988/0.853/1       | 0.9992/0.9027/0.9996 |
| Turtle            | 0.9941/0.3877/0.9934 | 0.9987/0.857/0.9906  |
| Whale             | 0.998/0.6449/0.9546  | 0.999/0.844/0.9633   |
| Bird              | 0.9874/0.3829/0.9722 | 0.9898/0.4288/0.9988 |
| Owl               | 0.9951/0.4828/0.9279 | 0.998/0.7502/0.9848  |
| Sabertooth        | 0.9993/0.8286/0.9911 | 0.9994/0.8644/0.9963 |
| Swan              | 0.9952/0.5695/0.9726 | 0.9971/0.7778/0.9722 |
| Sheep             | 0.9931/0.3924/0.9097 | 0.9941/0.4724/0.9418 |
| Pig               | 0.9988/0.7028/0.9758 | 0.9989/0.7404/0.9806 |
| Zalika            | 0.9935/0.4738/0.8973 | 0.9954/0.6172/0.9258 |
| Pheonix           | 0.9987/0.8225/0.974  | 0.999/0.8537/0.9838  |
| Elephant          | 0.9966/0.8491/0.9988 | 0.9978/0.9017/0.9973 |
| Parrot            | 0.9989/0.8754/0.979  | 0.9992/0.9046/0.9898 |
| Cat               | 0.9963/0.5492/0.9282 | 0.9986/0.736/0.9773  |
| Scorpion          | 0.9893/0.3496/0.9995 | 0.9891/0.3714/1      |
| Obesobeso         | 0.9943/0.4737/0.9369 | 0.998/0.749/0.9441   |
| Bear              | 0.9991/0.8322/0.9982 | 0.9993/0.8627/0.9992 |
| Puppy             | 0.9983/0.7162/0.9883 | 0.9989/0.81/0.9887   |
| Mean              | 0.996/0.6244/0.9663  | 0.9974/0.7553/0.9796 |

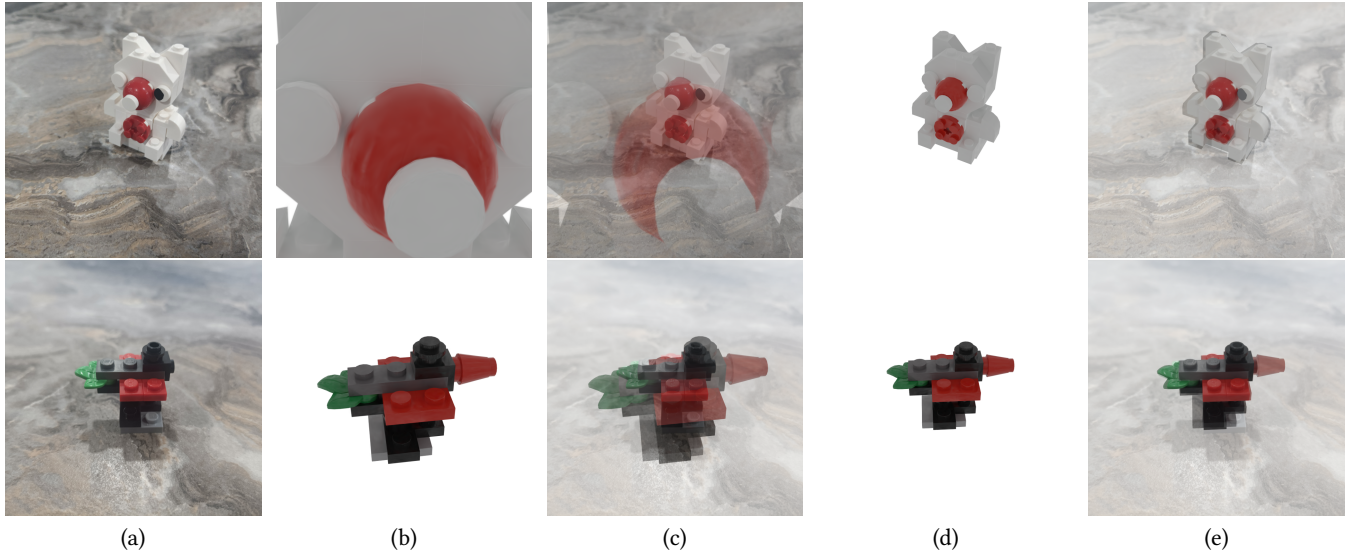

**Figure 1: The rendering results in real scenario with or without MPS. (a) is the test images, (b) and (c) are images rendered without MPS, (d) and (e) are images rendered with MPS.**

**Table 3: Results for pixel-level AUROC / pixel-level AP / image-level AUROC on MAD dataset using IGSPAD.**

| MPS               | ✓                          | ✓                    | ✓                    | ✓                    |
|-------------------|----------------------------|----------------------|----------------------|----------------------|
| Feature Extractor | resnet18                   | wide_resnet_50       | CAIT                 | sam_b                |
| Gorilla           | 0.9942/0.3742/0.924        | 0.9942/0.4929/0.9094 | 0.9762/0.0962/0.503  | 0.9984/0.8099/0.9611 |
| Unicorn           | 0.9939/0.3702/0.9951       | 0.995/0.4287/0.9913  | 0.9904/0.2445/0.7604 | 0.9993/0.8531/0.9974 |
| Mallard           | 0.9949/0.551/0.9906        | 0.9946/0.57/0.9991   | 0.9891/0.3089/0.6506 | 0.9992/0.9027/0.9996 |
| Turtle            | 0.9707/0.1523/0.8164       | 0.9865/0.385/0.9421  | 0.9761/0.1443/0.325  | 0.9987/0.857/0.9906  |
| Whale             | 0.9928/0.4089/0.953        | 0.9948/0.5049/0.9627 | 0.9858/0.2774/0.6335 | 0.999/0.844/0.9633   |
| Bird              | 0.989/0.3433/0.9562        | 0.9891/0.3723/0.9954 | 0.9893/0.2976/0.8171 | 0.9898/0.4288/0.9988 |
| Owl               | 0.9837/0.2505/0.8805       | 0.988/0.2782/0.9273  | 0.9768/0.0997/0.654  | 0.998/0.7502/0.9848  |
| Sabertooth        | 0.9865/0.2908/0.9311       | 0.9906/0.3367/0.952  | 0.984/0.1493/0.5176  | 0.9994/0.8644/0.9963 |
| Swan              | 0.9902/0.3224/0.9212       | 0.9873/0.301/0.927   | 0.9872/0.2606/0.6742 | 0.9971/0.7778/0.9722 |
| Sheep             | 0.988/0.2402/0.8823        | 0.9817/0.2721/0.9463 | 0.9884/0.2165/0.6635 | 0.9941/0.4724/0.9418 |
| Pig               | 0.9971/0.4799/0.9624       | 0.9956/0.4749/0.9632 | 0.9946/0.326/0.6846  | 0.9989/0.7404/0.9806 |
| Zalika            | 0.9841/0.306/0.8711        | 0.9859/0.3413/0.9093 | 0.9754/0.1962/0.5417 | 0.9954/0.6172/0.9258 |
| Pheonix           | 0.9949/0.5138/0.9391       | 0.9926/0.492/0.9515  | 0.9929/0.3968/0.7647 | 0.999/0.8537/0.9838  |
| Elephant          | 0.9937/0.5646/0.9933       | 0.9937/0.6063/0.9884 | 0.9892/0.5383/0.7335 | 0.9978/0.9017/0.9973 |
| Parrot            | 0.9948/0.5142/0.9834       | 0.9934/0.5153/0.9675 | 0.991/0.4392/0.7035  | 0.9992/0.9046/0.9898 |
| Cat               | 0.9925/0.3163/0.9062       | 0.9928/0.3883/0.9513 | 0.9921/0.2174/0.7249 | 0.9986/0.736/0.9773  |
| Scorpion          | 0.9837/0.2479/0.9827       | 0.9857/0.3096/0.9923 | 0.972/0.1269/0.7603  | 0.9891/0.3714/1      |
| Obesobeso         | 0.9899/0.3011/0.9192       | 0.9907/0.3782/0.9325 | 0.99/0.2635/0.6408   | 0.998/0.749/0.9441   |
| Bear              | 0.9941/0.43/0.9837         | 0.9915/0.4437/0.9881 | 0.9888/0.2793/0.6606 | 0.9993/0.8627/0.9992 |
| Puppy             | 0.9912/0.3383/0.9482       | 0.991/0.3399/0.9652  | 0.9839/0.1968/0.717  | 0.9989/0.81/0.9887   |
| Mean              | 0.989995/0.365795/0.936985 | 0.9907/0.4116/0.9581 | 0.9857/0.2523/0.6565 | 0.9974/0.7553/0.9796 |

**Table 4: Results for pixel-level AUROC / pixel-level AP / image-level AUROC on MAD dataset using IGSPAD.**

| MPS               | ✓                    | ✓                    | ✓                    |
|-------------------|----------------------|----------------------|----------------------|
| Feature Extractor | sam_b                | sam_l                | sam_h                |
| Gorilla           | 0.9984/0.8099/0.9611 | 0.998/0.75/0.9501    | 0.9977/0.742/0.9284  |
| Unicorn           | 0.9993/0.8531/0.9974 | 0.9992/0.8221/0.9995 | 0.9992/0.8321/0.9995 |
| Mallard           | 0.9992/0.9027/0.9996 | 0.9989/0.8648/0.9998 | 0.999/0.8765/1       |
| Turtle            | 0.9987/0.857/0.9906  | 0.9986/0.8307/0.9877 | 0.9987/0.84/0.9934   |
| Whale             | 0.999/0.844/0.9633   | 0.9988/0.8051/0.9595 | 0.9988/0.8164/0.9545 |
| Bird              | 0.9898/0.4288/0.9988 | 0.99/0.4091/0.997    | 0.9894/0.4294/0.9958 |
| Owl               | 0.998/0.7502/0.9848  | 0.9976/0.6985/0.9806 | 0.9977/0.7145/0.9785 |
| Sabertooth        | 0.9994/0.8644/0.9963 | 0.9993/0.8241/0.9944 | 0.9993/0.8286/0.9911 |
| Swan              | 0.9971/0.7778/0.9722 | 0.9956/0.7328/0.9714 | 0.9967/0.7427/0.9724 |
| Sheep             | 0.9941/0.4724/0.9418 | 0.9944/0.4342/0.9463 | 0.9946/0.4625/0.9474 |
| Pig               | 0.9989/0.7404/0.9806 | 0.9987/0.6908/0.9822 | 0.9988/0.7044/0.9758 |
| Zalika            | 0.9954/0.6172/0.9258 | 0.9949/0.5855/0.9232 | 0.9951/0.5981/0.9188 |
| Pheonix           | 0.999/0.8537/0.9838  | 0.9987/0.814/0.9819  | 0.9987/0.8225/0.974  |
| Elephant          | 0.9978/0.9017/0.9973 | 0.998/0.8736/0.9976  | 0.9976/0.885/0.9988  |
| Parrot            | 0.9992/0.9046/0.9898 | 0.999/0.8743/0.9849  | 0.9989/0.8754/0.979  |
| Cat               | 0.9986/0.736/0.9773  | 0.9985/0.7007/0.9834 | 0.9985/0.7165/0.9855 |
| Scorpion          | 0.9891/0.3714/1      | 0.9892/0.3409/0.9998 | 0.9893/0.3496/0.9995 |
| Obesobeso         | 0.998/0.749/0.9441   | 0.9972/0.7008/0.9396 | 0.9972/0.7072/0.949  |
| Bear              | 0.9993/0.8627/0.9992 | 0.9991/0.8266/0.9993 | 0.9991/0.8359/0.9982 |
| Puppy             | 0.9989/0.81/0.9887   | 0.9987/0.7716/0.9894 | 0.9987/0.7835/0.9883 |
| Mean              | 0.9974/0.7553/0.9796 | 0.9971/0.7175/0.9784 | 0.9971/0.7281/0.9764 |
